# Supplementary material for: Adolescents’ perceptions of tobacco accessibility and smoking norms and attitudes in response to the tobacco point-of-sale display ban in Scotland: results from the DISPLAY Study
Source: PubMed Central journal article supplement (PMC7231455; doi:10.1136/tobaccocontrol-2018-054702), 2019-05-03
Supplement: tobaccocontrol-2018-054702supp002.pdf [file tobaccocontrol-2018-054702supp002.pdf]

## SUPPLEMENTARY TABLES

**Table S1:** Post-hoc analysis: the confounding effect of e-cigarette use in the trend in outcomes over time.

|                                                                                                                      | Access           | Norm             | Attitude         |
|----------------------------------------------------------------------------------------------------------------------|------------------|------------------|------------------|
| <b>Model A: year segments, e-cigarettes</b>                                                                          |                  |                  |                  |
| Time segments                                                                                                        |                  |                  |                  |
| 2013                                                                                                                 | Ref              | Ref              | Ref              |
| 2014-2015                                                                                                            | 0.65 (0.54-0.80) | 0.54 (0.44-0.67) | 0.51 (0.40-0.66) |
| 2016-2017                                                                                                            | 0.56 (0.45-0.69) | 0.59 (0.48-0.74) | 0.34 (0.26-0.46) |
| E-cigarette use                                                                                                      |                  |                  |                  |
| Never used                                                                                                           | Ref              | Ref              | Ref              |
| Used once or twice                                                                                                   | 3.04 (2.48-3.73) | 4.69 (3.85-5.71) | 4.97 (3.88-6.37) |
| Current/past occasional or regular use                                                                               | 7.25 (5.65-9.29) | 12.1 (9.48-15.5) | 16.8 (12.7-22.2) |
| <b>Model B: year segments, school, school year, gender, age, ethnicity, FAS, smoking, family smoking, e-cig. use</b> |                  |                  |                  |
| Time segments                                                                                                        |                  |                  |                  |
| 2013                                                                                                                 | Ref              | Ref              | Ref              |
| 2014-2015                                                                                                            | 0.72 (0.59-0.88) | 0.64 (0.51-0.79) | 0.68 (0.52-0.90) |
| 2016-2017                                                                                                            | 0.70 (0.56-0.87) | 0.90 (0.72-1.14) | 0.62 (0.46-0.85) |
| E-cigarette use                                                                                                      |                  |                  |                  |
| Never used                                                                                                           | Ref              | Ref              | Ref              |
| Used once or twice                                                                                                   | 2.15 (1.72-2.68) | 2.94 (2.37-3.64) | 2.46 (1.86-3.27) |
| Current/past occasional or regular use                                                                               | 4.49 (3.36-6.00) | 6.09 (4.48-8.27) | 5.62 (3.89-8.13) |
| <b>Model C: year segments, school, school year, gender, age, ethnicity, FAS, e-cigarette use</b>                     |                  |                  |                  |
| Time segments                                                                                                        |                  |                  |                  |
| 2013                                                                                                                 | Ref              | Ref              | Ref              |
| 2014-2015                                                                                                            | 0.69 (0.57-0.85) | 0.56 (0.45-0.69) | 0.54 (0.41-0.69) |
| 2016-2017                                                                                                            | 0.64 (0.51-0.79) | 0.69 (0.55-0.87) | 0.39 (0.29-0.52) |
| E-cigarette use                                                                                                      |                  |                  |                  |
| Never used                                                                                                           | Ref              | Ref              | Ref              |
| Used once or twice                                                                                                   | 2.36 (1.91-2.93) | 3.74 (3.04-4.60) | 3.82 (2.94-4.95) |
| Current/past occasional or regular use                                                                               | 5.89 (4.52-7.67) | 11.1 (8.49-14.5) | 14.9 (11.0-20.2) |
| <b>Model D: year segments, school, school year, gender, age, ethnicity, FAS, friends smoking</b>                     |                  |                  |                  |
| Time segments                                                                                                        |                  |                  |                  |
| 2013                                                                                                                 | Ref              | Ref              | Ref              |
| 2014-2015                                                                                                            | 0.97 (0.89-1.18) | 1.02 (0.82-1.28) | 1.04 (0.81-1.34) |
| 2016-2017                                                                                                            | 1.01 (0.82-1.23) | 1.40 (1.13-1.73) | 0.95 (0.75-1.22) |
| Friend smoking                                                                                                       |                  |                  |                  |
| None of them                                                                                                         | Ref              | Ref              | Ref              |
| At least some of them                                                                                                | 3.51 (2.97-4.16) | 15.3 (12.2-19.1) | 11.2 (8.52-14.7) |
| Don't know                                                                                                           | 1.02 (0.75-1.38) | 1.90 (1.29-2.80) | 2.52 (1.64-3.87) |

FAS = Family Affluence Scale

E-cig = e-cigarette

**Table S2:** Sensitivity analysis 1: analysis conducted in only never-smokers (5,014 observations; 81% of sample). This model excludes smoking status (as there are no smokers), but adds smoking susceptibility.

|                                                           | <b>Tobacco accessibility<sup>a</sup></b> | <b>Smoking norm<sup>b</sup></b> | <b>Smoking attitude<sup>c</sup></b> |
|-----------------------------------------------------------|------------------------------------------|---------------------------------|-------------------------------------|
| Time segments                                             |                                          |                                 |                                     |
| 2013                                                      | Ref                                      | Ref                             | Ref                                 |
| 2014-2015                                                 | 1.00 (0.76-1.31)                         | 1.18 (0.83-1.69)                | 1.26 (0.79-2.00)                    |
| 2016-2017                                                 | 0.97 (0.73-1.29)                         | 1.62 (1.14-2.31)                | 0.82 (0.49-1.37)                    |
| School year, 4 <sup>th</sup> year vs 2 <sup>nd</sup> year | 2.37 (1.53-3.68)                         | 2.82 (1.68-4.74)                | 5.57 (2.54-12.2)                    |
| Gender, female vs male                                    | 1.25 (1.02-1.53)                         | 0.84 (0.66-1.06)                | 0.89 (0.63-1.25)                    |
| Age, per year increase                                    | 1.14 (0.94-1.38)                         | 1.05 (0.83-1.32)                | 0.84 (0.60-1.18)                    |
| Ethnicity, non-white vs white                             | 1.10 (0.71-1.70)                         | 1.12 (0.66-1.87)                | 0.56 (0.20-1.56)                    |
| Family affluence (FAS)                                    |                                          |                                 |                                     |
| Low                                                       | Ref                                      | Ref                             | Ref                                 |
| Medium                                                    | 1.25 (0.97-1.61)                         | 1.00 (0.74-1.34)                | 1.00 (0.66-1.52)                    |
| High                                                      | 1.35 (1.03-1.76)                         | 0.96 (0.70-1.32)                | 0.94 (0.59-1.47)                    |
| E-cigarette use                                           |                                          |                                 |                                     |
| Never used                                                | Ref                                      | Ref                             | Ref                                 |
| Used once or twice                                        | 1.38 (1.00-1.90)                         | 0.99 (0.70-1.40)                | 0.98 (0.60-1.60)                    |
| Occasional or regular                                     | 2.71 (1.56-4.72)                         | 1.37 (0.73-2.56)                | 1.98 (0.87-4.50)                    |
| Smoking susceptibility <sup>d</sup>                       |                                          |                                 |                                     |
| Non-susceptible                                           | Ref                                      | Ref                             | Ref                                 |
| Susceptible                                               | 1.56 (1.26-1.94)                         | 1.74 (1.34-2.24)                | 3.54 (2.43-5.15)                    |
| Family smoking                                            |                                          |                                 |                                     |
| 0                                                         | Ref                                      | Ref                             | Ref                                 |
| 1                                                         | 0.88 (0.68-1.15)                         | 1.28 (0.96-1.72)                | 1.79 (1.17-2.73)                    |
| ≥2                                                        | 1.23 (0.93-1.64)                         | 1.24 (0.88-1.74)                | 2.48 (1.56-3.92)                    |
| Friend smoking                                            |                                          |                                 |                                     |
| None of them                                              | Ref                                      | Ref                             | Ref                                 |
| At least some                                             | 2.49 (1.99-3.11)                         | 8.70 (6.51-11.6)                | 4.02 (2.65-6.10)                    |
| Don't know                                                | 1.03 (0.73-1.44)                         | 1.48 (0.91-2.39)                | 2.17 (1.25-3.77)                    |

<sup>a</sup> Tobacco accessibility was defined as perceiving tobacco to be purchasable in shops by someone their age.

<sup>b</sup> Smoking norm was defined as perceiving that friends think it is OK for people their age to smoke.

<sup>c</sup> Smoking attitude was defined as thinking it is OK for someone their age to smoke.

<sup>d</sup> This model excludes smoking status (as there are no smokers), but adds smoking susceptibility.

**Table S3:** Sensitivity analysis 2: quantifying the change between 2014-2015 and 2016-2017, excluding the 2013 data. Presented analyses were adjusted for age, gender, ethnicity, FAS, school year, school, smoking status, e-cigarette use, family smoking, and friend smoking.

|               | <b>Tobacco accessibility<sup>a</sup></b> |                      | <b>Smoking norm<sup>b</sup></b> |                      | <b>Smoking attitude<sup>c</sup></b> |                      |
|---------------|------------------------------------------|----------------------|---------------------------------|----------------------|-------------------------------------|----------------------|
|               | <b>All years</b>                         | <b>2013 excluded</b> | <b>All years</b>                | <b>2013 excluded</b> | <b>All years</b>                    | <b>2013 excluded</b> |
| Time segments |                                          |                      |                                 |                      |                                     |                      |
| 2014-2015     | Ref                                      | Ref                  | Ref                             | Ref                  | Ref                                 | Ref                  |
| 2013          | 1.25 (1.01-1.54)                         | -                    | 1.22 (0.96-1.55)                | -                    | 1.20 (0.89-1.61)                    | -                    |
| 2016-2017     | 0.90 (0.75-1.08)                         | 0.89 (0.74-1.07)     | 1.22 (1.00-1.49)                | 1.20 (0.98-1.46)     | 0.80 (0.62-1.03)                    | 0.79 (0.61-1.02)     |

<sup>a</sup> Tobacco accessibility was defined as perceiving tobacco to be purchasable in shops by someone their age.

<sup>b</sup> Smoking norm was defined as perceiving that friends think it is OK for people their age to smoke.

<sup>c</sup> Smoking attitude was defined as thinking it is OK for someone their age to smoke.

**Table S4:** Post-hoc analysis: check whether there is an association between frequency of shop visits and three outcomes, before the display bans were implemented (2013). Logistic regression analysis controlled for school year, gender, age, ethnicity, FAS, school, smoking status, e-cig use, family smoking, and friend smoking.

| <b>Odds ratio (95% confidence interval)</b> |                           |                          |
|---------------------------------------------|---------------------------|--------------------------|
|                                             | <b>Supermarket visits</b> | <b>Small shop visits</b> |
| <b>Tobacco accessibility<sup>a</sup></b>    |                           |                          |
| Rarely                                      | Ref                       | Ref                      |
| Sometimes                                   | 0.72 (0.47-1.08)          | 2.68 (1.03-6.99)         |
| Often                                       | 1.42 (0.88-2.27)          | 5.64 (2.20-14.5)         |
| <b>Smoking norm<sup>b</sup></b>             |                           |                          |
| Rarely                                      | Ref                       | Ref                      |
| Sometimes                                   | 0.68 (0.42-1.08)          | 0.79 (0.39-1.60)         |
| Often                                       | 0.98 (0.57-1.69)          | 1.19 (0.60-2.38)         |
| <b>Smoking attitude<sup>c</sup></b>         |                           |                          |
| Rarely                                      | Ref                       | Ref                      |
| Sometimes                                   | 1.12 (0.64-1.99)          | 0.94 (0.39-2.22)         |
| Often                                       | 1.48 (0.77-2.83)          | 1.27 (0.55-2.93)         |

<sup>a</sup> Tobacco accessibility was defined as perceiving tobacco to be purchasable in shops by someone their age.

<sup>b</sup> Smoking norm was defined as perceiving that friends think it is OK for people their age to smoke.

<sup>c</sup> Smoking attitude was defined as thinking it is OK for someone their age to smoke.
